# Supplementary material for: A Functional Mutation in KIAA1462 Promoter Decreases Glucocorticoid Receptor Affinity and Affects Egg-Laying Performance in Yangzhou Geese
Source: MDPI journal article supplement (doi:10.3390/ijms19051531), 2018-05-21
Supplement: s1 [file s1]

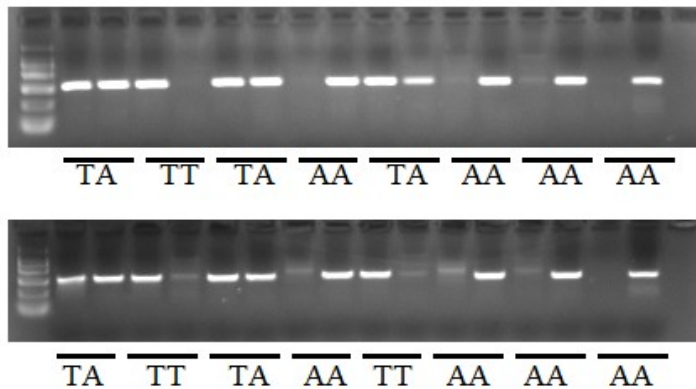

**Figure S1.** Genotyping of rs1714766362 SNP in *KIAA1462* gene by AS-PCR.

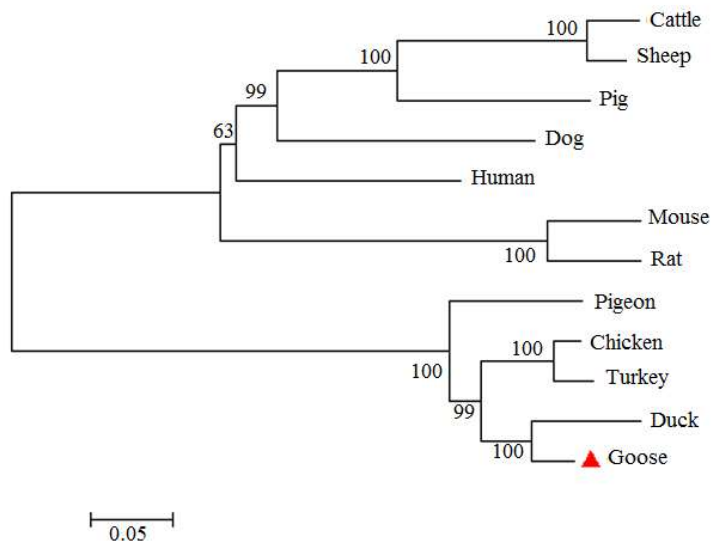

**Figure S2.** The phylogenetic tree of *KIAA1462* protein was constructed with the neighbour-joining method by using MEGA5. A 1000 bootstrap replication was chosen to test the reliability of each branch. Bootstrap values are indicated as numbers at the branch nodes. Aminoacid sequences of *KIAA1462* for these species were downloaded from protein database of NCBI. Their corresponding accession numbers are same as given in Table 4.

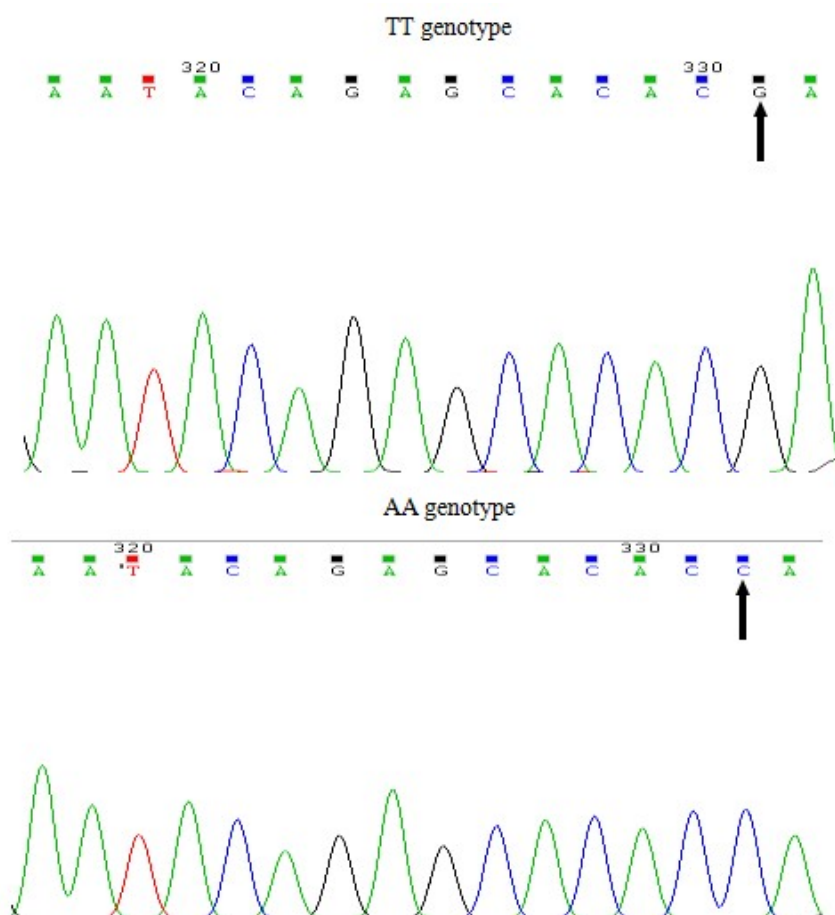

**Figure S3.** Direct DNA sequencing of the 3-kb promoter region using DNA from AA genotype individuals and TT genotype individuals of SNP rs1714766362. A mutation (c.-413C>G) 413-bp upstream of the start codon point of *KIAA1462* gene was completely linked with SNP rs1714766362: it was C in AA genotype individuals and G in TT genotype individuals.

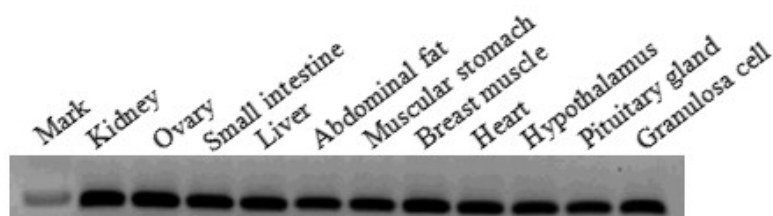

**Figure S4.** mRNA expression levels of goose GAPDH gene in different tissues was detected by Semi-quantitative RT-PCR.

**Table S1.** The sequences of each oligo used in the EMSA.

|      |                 | Forward                             | Reverse                             |
|------|-----------------|-------------------------------------|-------------------------------------|
| EMSA | SNP(g.413C>G)-C | AAACAGCTTTCCTCTGGTGTG<br>CTCTGTATTC | GAATACAGAGCACACCAGAGGAAAG<br>CTGTTT |
|      | SNP(g.413C>G)-G | AAACAGCTTTCCTCTCGTGTG<br>CTCTGTATTC | GAATACAGAGCACACGAGAGGAAAG<br>CTGTTT |
|      | GR (GRE)        | TCGACTGTACAGGATGTTGCT<br>ACT        | AGCTGACATGTCCTACAACGATGA            |
